# Supplementary material
Source: ML conference proceedings conference paper supplement (https://proceedings.mlr.press/v97/osama19a.html)
Supplement: Supplementary file [file osama19a-supp.pdf]

# Inferring Heterogeneous Causal Effects in Presence of Spatial Confounding: Supplementary material

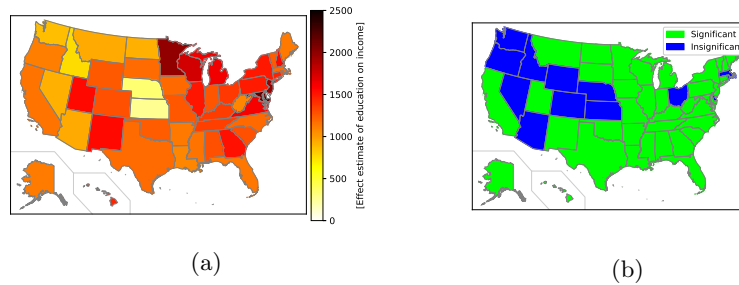

Figure 1: USA real data (a) The estimated effect  $\hat{\tau}(\mathbf{s})$  of education attainment on annual median household income. The 95% bootstrap confidence interval of  $\hat{\tau}(\mathbf{s})$  obtained using pivotal bootstrap method [1] and 1000 bootstrap iterations. The green states are where the confidence interval does not contain zero and hence the effect estimate is significant. The blue states are those where the confidence interval contains zero and hence the effect is insignificant.

## References

- [1] Larry Wasserman. *All of statistics: a concise course in statistical inference*. Springer Science & Business Media, 2013.
